# Supplementary material for: Satellite Tracking of Head-Started Juvenile Green Turtles (Chelonia mydas) Reveals Release Effects and an Ontogenetic Shift
Source: Animals (Basel). 2023 Mar 31;13(7):1218. doi: 10.3390/ani13071218 (PMC10093175; doi:10.3390/ani13071218)
Supplement: Supplementary file 1 [file animals-13-01218-s001.zip › animals-2259595-supplementary.pdf]

**Table S1.** Individual-level (N=40) data for: age class, number of raw locations, body mass (kg), curved carapace length (CCL, cm) and width (CCW, cm), tag (S= Solar, NS= non-solar/satellite) and adhesive (E= epoxy, FC= Fast Cure) type, median timestep between raw locations (hrs), and tag duration (days). Individuals 214082 and 203086 are greyed out, as they only had one location each outside the boundaries of Grand Cayman Island and were removed from further analysis.

| ID     | Tracking Period | Movement Pattern | Age Class | No. of Raw Locations | Mean Locations per day | Body Mass kg | CCL cm | CCW cm | Adhesive Type | Tag Type | Median Timestep hrs | Days Tracked days |
|--------|-----------------|------------------|-----------|----------------------|------------------------|--------------|--------|--------|---------------|----------|---------------------|-------------------|
| 202985 | Jan             | Residential      | 1-2 Yrs   | 15                   | 1.6                    | 5.3          | 37     | 32     | E             | NS       | 22.7                | 10.0              |
| 203084 | Jan             | Dispersive       | 1-2 Yrs   | 32                   | 3.7                    | 4.3          | 37     | 29     | FC            | NS       | 11.9                | 23.5              |
| 203407 | Jan             | Residential      | 1-2 Yrs   | 79                   | 6.6                    | 5.6          | 37     | 32     | FC            | S        | 10.5                | 12.5              |
| 203408 | Jan             | Dispersive       | 1-2 Yrs   | 40                   | 5.8                    | 4.2          | 35     | 30     | E             | S        | 11.3                | 18.0              |
| 203410 | Jan             | Dispersive       | 1-2 Yrs   | 126                  | 14.2                   | 4.3          | 35     | 31     | FC            | S        | 1.7                 | 12.5              |
| 212846 | Jan             | Residential      | 1-2 Yrs   | 22                   | 3.7                    | 4.3          | 35     | 31     | E             | NS       | 10.8                | 32.5              |
| 214069 | Jan             | Dispersive       | 1-2 Yrs   | 19                   | 3.5                    | 6.8          | 40     | 34     | FC            | NS       | 12.0                | 10.5              |
| 214083 | Jan             | Residential      | 1-2 Yrs   | 87                   | 4.1                    | 4.8          | 38     | 31     | FC            | S        | 11.0                | 29.5              |
| 214085 | Jan             | Dispersive       | 1-2 Yrs   | 115                  | 12.7                   | 5.0          | 38     | 33     | E             | S        | 2.4                 | 16.5              |
| 203436 | Jan             | Residential      | 1-2 Yrs   | 5                    | 1.0                    | 6.3          | 40     | 31     | E             | NS       | 17.7                | 3.0               |
| 203080 | Jan             | Residential      | 2-3 Yrs   | 9                    | 2.0                    | 12.8         | 51     | 43     | E             | NS       | 23.3                | 10.0              |
| 203087 | Jan             | Dispersive       | 2-3 Yrs   | 28                   | 2.6                    | 17.2         | 53     | 46     | E             | NS       | 11.2                | 12.5              |
| 203403 | Jan             | Residential      | 2-3 Yrs   | 50                   | 4.2                    | 23.3         | 61     | 51     | E             | S        | 11.2                | 11.5              |
| 203404 | Jan             | Residential      | 2-3 Yrs   | 13                   | 2.5                    | 12.9         | 51     | 42     | E             | S        | 13.2                | 5.4               |
| 203406 | Jan             | Residential      | 2-3 Yrs   | 16                   | 3.6                    | 19.5         | 62     | 51     | E             | S        | 6.1                 | 3.5               |
| 212847 | Jan             | Dispersive       | 2-3 Yrs   | 37                   | 3.5                    | 14.8         | 51     | 46     | E             | NS       | 12.1                | 18.9              |
| 212867 | Jan             | Dispersive       | 2-3 Yrs   | 29                   | 2.8                    | 14.2         | 51     | 44     | E             | NS       | 11.3                | 23.0              |
| 214081 | Jan             | Dispersive       | 2-3 Yrs   | 60                   | 7.4                    | 9.6          | 44     | 38     | E             | S        | 10.7                | 10.5              |
| 214082 | Jan             | -                | 2-3 Yrs   | 1                    | -                      | 11.6         | 47     | 41     | E             | S        | -                   | 0                 |
| 203086 | Jan             | -                | 2-3 Yrs   | 1                    | -                      | 15.2         | 51     | 45     | E             | NS       | -                   | 0                 |
| 203089 | Jan             | Residential      | 3-4 Yrs   | 13                   | 1.4                    | 22.7         | 60     | 51     | E             | NS       | 22.3                | 19.0              |
| 203405 | Jan             | Residential      | 3-4 Yrs   | 27                   | 9.1                    | 22.6         | 59     | 52     | E             | S        | 1.3                 | 3.0               |
| 203409 | Jan             | Dispersive       | 3-4 Yrs   | 41                   | 3.0                    | 29.4         | 65     | 55     | E             | S        | 12.5                | 15.0              |
| 203411 | Jan             | Dispersive       | 3-4 Yrs   | 207                  | 7.8                    | 20.4         | 58     | 51     | E             | S        | 1.8                 | 28.1              |
| 203412 | Jan             | Residential      | 3-4 Yrs   | 6                    | 2.6                    | 24.9         | 58     | 53     | E             | S        | 12.0                | 3.0               |
| 212837 | Jan             | Residential      | 3-4 Yrs   | 26                   | 2.9                    | 29.5         | 62     | 54     | E             | NS       | 10.7                | 11.5              |
| 212845 | Jan             | Dispersive       | 3-4 Yrs   | 10                   | 2.2                    | 29.4         | 62     | 52     | E             | NS       | 23.7                | 5.6               |
| 212862 | Jan             | Residential      | 3-4 Yrs   | 25                   | 1.9                    | 20.4         | 54     | 48     | E             | NS       | 23.3                | 19.0              |
| 212866 | Jan             | Residential      | 3-4 Yrs   | 13                   | 2.8                    | 13.6         | 54     | 44     | E             | NS       | 47.8                | 19.0              |
| 228045 | Jan             | Residential      | 3-4 Yrs   | 73                   | 8.3                    | 31.8         | 62     | 53     | E             | S        | 10.7                | 18.5              |
| 229669 | Jul             | Dispersive       | 1-2 Yrs   | 55                   | 13.3                   | 5.1          | 37     | 32     | FC            | S        | 1.3                 | 11.6              |
| 229670 | Jul             | Dispersive       | 1-2 Yrs   | 56                   | 12.3                   | 5.7          | 38     | 33     | FC            | S        | 1.1                 | 24.6              |
| 229671 | Jul             | Dispersive       | 1-2 Yrs   | 60                   | 16.1                   | 6.3          | 40     | 34     | FC            | S        | 0.9                 | 10.5              |
| 229672 | Jul             | Dispersive       | 1-2 Yrs   | 43                   | 12.6                   | 5.2          | 39     | 32     | FC            | S        | 1.5                 | 9.5               |
| 229673 | Jul             | Dispersive       | 1-2 Yrs   | 54                   | 14.8                   | 5.3          | 37     | 33     | FC            | S        | 1.2                 | 10.5              |
| 229674 | Jul             | Dispersive       | 1-2 Yrs   | 42                   | 10.1                   | 5.0          | 37     | 32     | FC            | S        | 1.3                 | 10.5              |
| 229675 | Jul             | Dispersive       | 1-2 Yrs   | 59                   | 17.1                   | 6.4          | 38     | 34     | FC            | S        | 0.8                 | 10.6              |

|        |     |            |         |    |      |     |    |    |    |   |     |      |
|--------|-----|------------|---------|----|------|-----|----|----|----|---|-----|------|
| 229676 | Jul | Dispersive | 1-2 Yrs | 55 | 17.4 | 4.9 | 36 | 32 | FC | S | 1.1 | 10.6 |
| 229677 | Jul | Dispersive | 1-2 Yrs | 54 | 12.7 | 5.3 | 36 | 33 | FC | S | 1.2 | 10.5 |
| 229678 | Jul | Dispersive | 1-2 Yrs | 41 | 15.4 | 4.8 | 36 | 33 | FC | S | 1.0 | 8.0  |

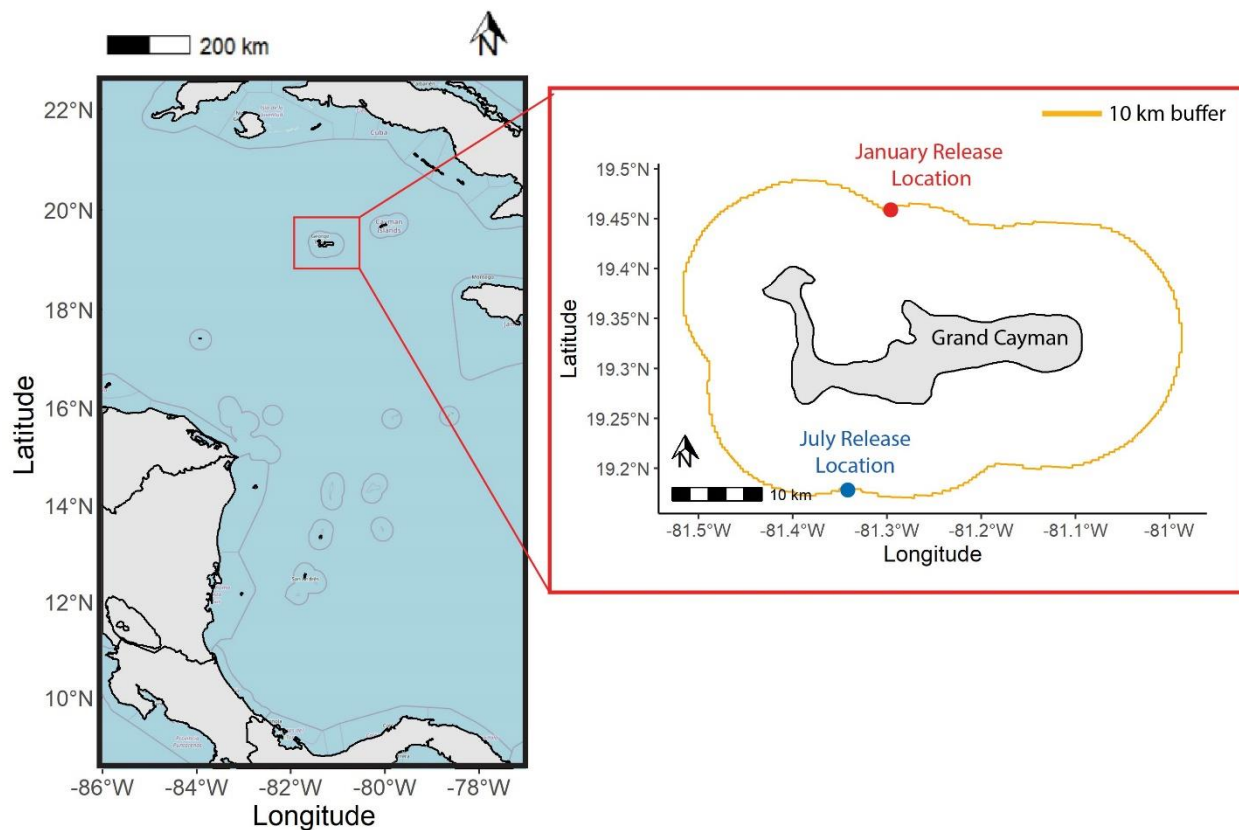

**Figure S1.** Map of the study region, with the red box showing a zoomed up view of Grand Cayman island (the captive rearing location) of the Cayman Islands, the January (red) and July (blue) release locations, and a 10-km buffer around the Island (yellow), which was used for filtering and data processing (see *Methods*).

A)

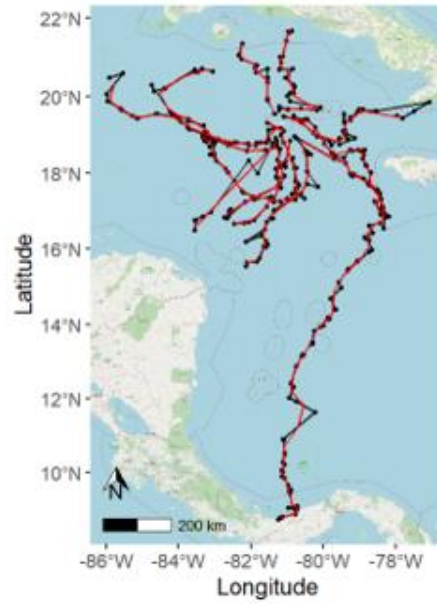

B)

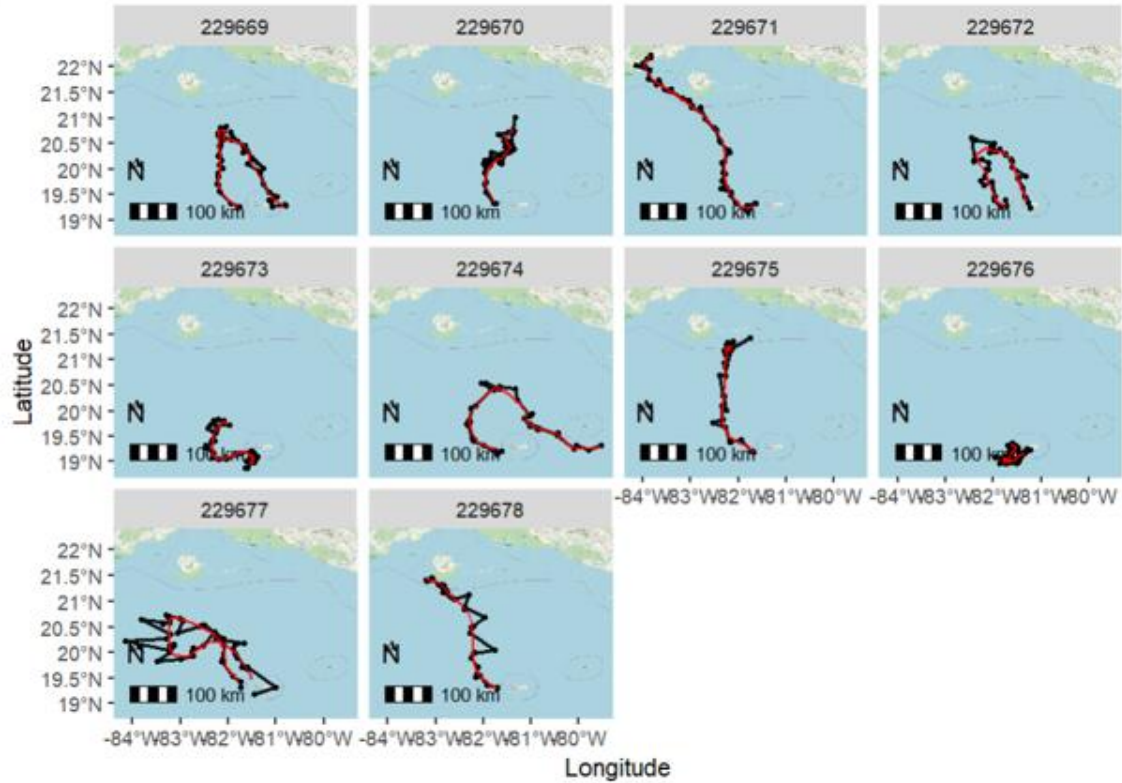

**Figure S2.** Maps of raw tracks and positions (black) overlaid with interpolated trajectories (red) for dispersive individuals in A) the January tracking period (N=12) and B) the July tracking period (N=10). To match the resolution of environmental data products and filter out error positions, locations within a 1 km buffer of the island were removed prior to interpolation. All remaining raw locations were filtered and regularized through the “foieGras” R package (Jonsen et al. 2019), resulting in daily positions for each individual.

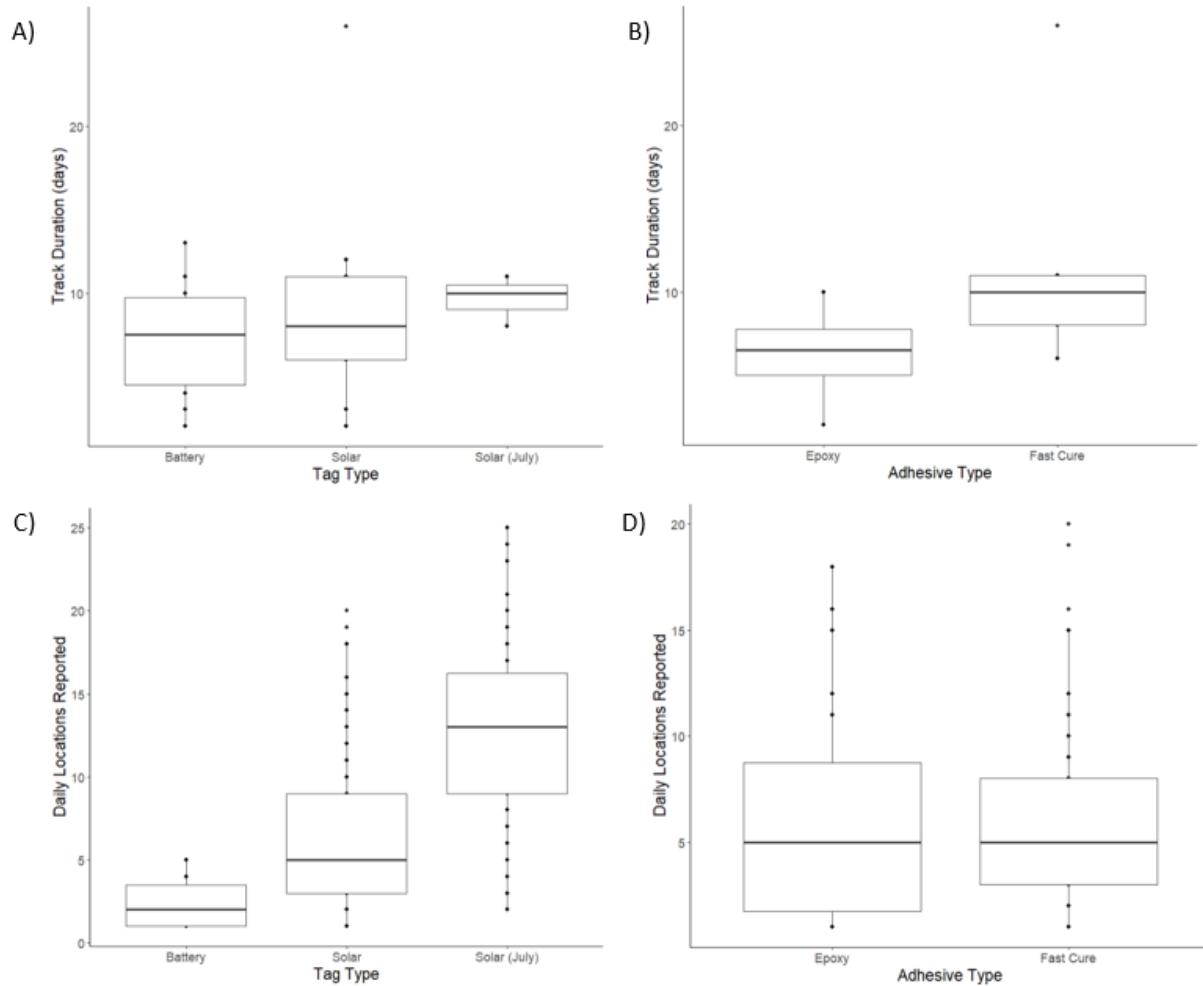

**Figure S3.** Boxplots of the tag duration by A) tag type (battery-powered vs. solar satellite tags) for all N=40 turtles and B) attachment type (fast-cure vs. epoxy) for N=10 turtles in the 1-2 year age class released in January. Note that turtles released in July are shown in a separate group due to being released at a different time period and location. Boxplots are also shown for the daily number of locations reported for C) tag type (N=40) and D) attachment type (N=10 turtles in the 1-2 years age class, released in January).

A)

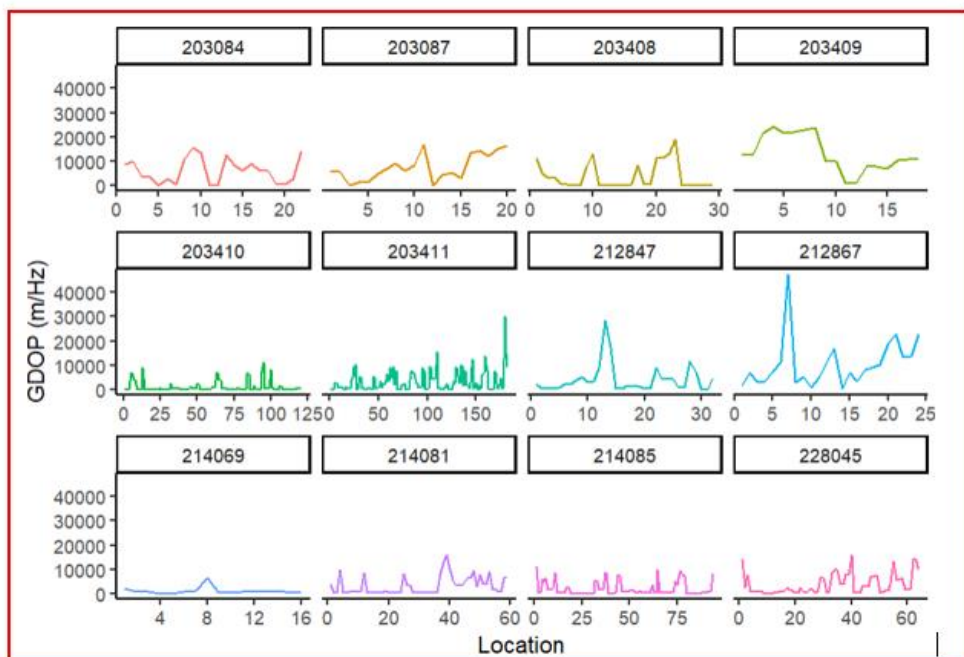

B)

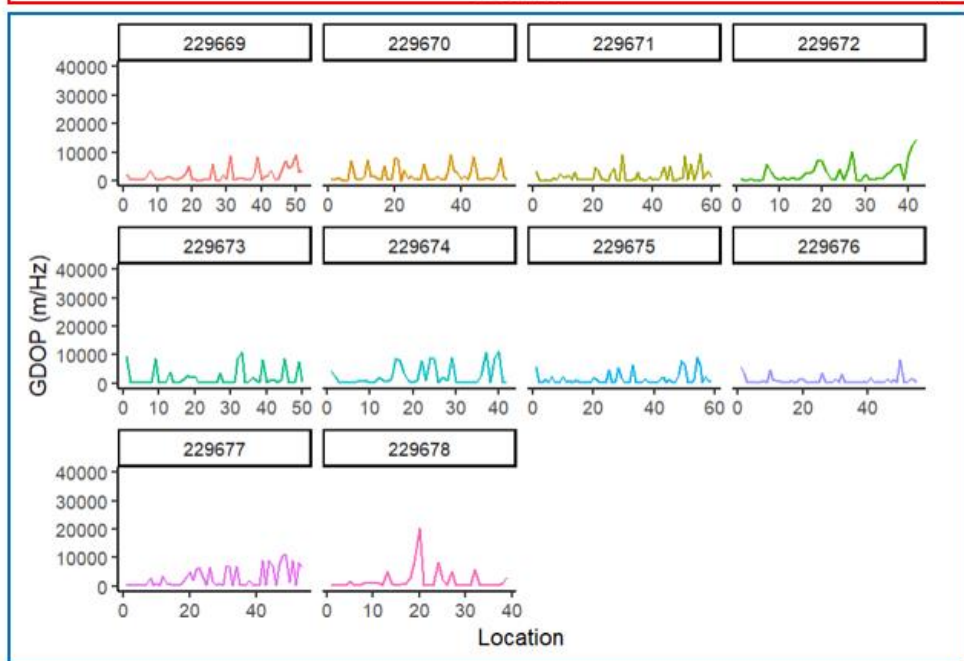

**Figure S4.** Plots of the Geometric Dilution of Precision (GDOP, a measure of ARGOS location accuracy error) values as a function of raw location number for A) January and B) July turtles.
